# Supplementary material for: Identification of FDA-Approved Oncology Drugs with Selective Potency in High-Risk Childhood Ependymoma
Source: Oxford University Press journal article supplement (doi:10.1158/1535-7163.mct-17-1185), 2018-06-20
Supplement: 15357163mct171185-sup-193178_2_supp_4789433_p9wh30.xlsx [file 15357163mct171185-sup-193178_2_supp_4789433_p9wh30.xlsx]

## Sheet: FDA panel
FDA approved oncology drug	Selleck Cat#	Smiles	CAS Number	molecular weight
Methoxyestradiol	S1233	C1(=C(C=C2C(=C1)[C@]3([C@@](CC2)([C@]4([C@](CC3)([C@@H](CC4)O)C)[H])[H])[H])O)OC	362-07-2	302.41
Methotrexate	S1210	N1=C(N=C2C(=C1N)N=C(C=N2)CN(C3=CC=C(C=C3)C(N[C@@H](CCC(=O)O)C(=O)O)=O)C)N	59-05-2	454.44
Fluorouracil	S1209	C1(NC(C(=CN1)F)=O)=O	51-21-8	130.08
Afatinib	S1011	C1(=C(C=C(C=C1)NC2=NC=NC3=C2C=C(C(=C3)O[C@H]4CCOC4)NC(/C=C/CN(C)C)=O)Cl)F	439081-18-2	485.94
Altretamine	S1278	N1=C(N=C(N=C1N(C)C)N(C)C)N(C)C	645-05-6	210.28
Aminoglutethimide	S1672	C1(=CC=C(C=C1)N)C2(CCC(NC2=O)=O)CC	125-84-8	232.28
Anastrozole	S1188	C1=C(C=C(C=C1CN2C=NC=N2)C(C)(C)C#N)C(C)(C)C#N	120511-73-1	293.37
Axitinib	S1005	C1(=CC=CC=C1C(=O)NC)SC2=CC3=C(C=C2)C(=NN3)/C=C/C4=CC=CC=N4	319460-85-0	386.47
Azacitidine	S1782	[C@H]1([C@H](O[C@H]([C@H]1O)N2C(N=C(N=C2)N)=O)CO)O	320-67-2	244.2
Bendamustine	S1212	C1(=C(C=C2C(=C1)N(C(=N2)CCCC(O)=O)C)N(CCCl)CCCl).Cl	3543-75-7	394.72
Bexarotene	S2098	C12=C(C=C(C(=C1)C)C(C3=CC=C(C=C3)C(=O)O)=C)C(CCC2(C)C)(C)C	153559-49-0	348
Bicalutamide	S1190	C(C(CS(=O)(=O)C1C=CC(=CC=1)F)(C)O)(=O)NC2C=C(C(=CC=2)C#N)C(F)(F)F	90357-06-5	430.37
Bleomycin	S1214	S(=O)(=O)(O)[O-].[C@H](C(C1N=CNC=1)O[C@@H]2[C@@]([C@@H]([C@H]([C@H](O2)CO)O)O)(O[C@@H]3[C@H]([C@H]([C@@H]([C@H](O3)CO)O)OC(N)=O)O)[H])(C(N[C@H]([C@@H]([C@H](C(N[C@H]([C@@H](C)O)C(NCCC4=NC(=CS4)C5=NC(=CS5)C(NCCC[S+](C)C)=O)=O)=O)C)O)C)=O)NC(C6N=C(N=C(C=6C)N)[C@@H](NC[C@H](C(N)=O)N)CC(N)=O)=O	9041-93-4	1512.62
Bortezomib	S1013	C1=CN=CC(=N1)C(N[C@H](C(N[C@H](B(O)O)CC(C)C)=O)CC2=CC=CC=C2)=O	179324-69-7	384.24
Bosutinib	S1014	N1=CC(=C(C2=CC(=C(C=C12)OCCCN3CCN(CC3)C)OC)NC4C(=CC(=C(C=4)OC)Cl)Cl)C#N	380843-75-4	530.45
Busulfan	S1692	CS(OCCCCOS(C)(=O)=O)(=O)=O	55-98-1	246.3
Capecitabine	S1156	N1=C(C(=CN(C1=O)[C@@H]2O[C@@H]([C@H]([C@@H]2O)O)C)F)NC(OCCCCC)=O	154361-50-9	359.35
Carmofur	S1289	C1(C(NC(N(C=1)C(NCCCCCC)=O)=O)=O)F	61422-45-5	257.26
Celecoxib	S1261	C1(=CC=C(C=C1)S(N)(=O)=O)N2C(=CC(=N2)C(F)(F)F)C3=CC=C(C=C3)C	169590-42-5	381.37
Cisplatin	S1166	[Pt](N)(Cl)(Cl)N	15663-27-1	300.05
Cladribine	S1199	N1=C(C2=C(N=C1Cl)N(C=N2)[C@H]3C[C@@H]([C@H](O3)CO)O)N	4291-63-8	285.69
Clofarabine	S1218	N1=C(N=C2C(=C1N)N=CN2[C@H]3[C@H]([C@@H]([C@H](O3)CO)O)F)Cl	123318-82-1	303.68
Crizotinib	S1068	C1(=CC(=C(N=C1)N)O[C@@H](C2=C(C=CC(=C2Cl)F)Cl)C)C3=CN(N=C3)C4CCNCC4	877399-52-5	450.34
Cyclophosphamide	S2057	C1(CNP(OC1)(=O)N(CCCl)CCCl).O	6055-19-2	279.1
Dacarbazine	S1221	C1=NC(=C(N1)/N=N/N(C)C)C(=O)N	4342-03-4	182.18
DAPT	S2215	C1(=CC(=CC(=C1)CC(=O)N[C@@H](C)C(N[C@H](C(=O)OC(C)(C)C)C2=CC=CC=C2)=O)F)F	208255-80-5	432.46
Dasatinib	S1021	N1=C(N=C(C=C1NC2=NC=C(S2)C(NC3=C(C=CC=C3C)Cl)=O)N4CCN(CC4)CCO)C	302962-49-8	488.01
Daunorubicin	S3035	C1(=CC=C2C(=C1OC)C(C3=C(C2=O)C(=C4C(=C3O)[C@@H](C[C@](C4)(O)C(C)=O)O[C@]5(C[C@@H]([C@@H]([C@@H](O5)C)O)N)[H])O)=O).Cl	23541-50-6	563.98
Decitabine	S1200	[C@H]1(O[C@@H]([C@H](C1)O)CO)N2C=NC(=NC2=O)N	2353-33-5	228.21
Disulfiram	S1680	CCN(C(SSC(N(CC)CC)=S)=S)CC	97-77-8	296.54
Docetaxel	S1148	C1=CC=CC=C1C(=O)O[C@H]2[C@]3(C[C@H](C(=C([C@H](C([C@]4([C@H](C[C@@H]5[C@](C42)(OC(C)=O)CO5)O)C)=O)O)C(C)(C)3)C)OC([C@@H]([C@H](C6=CC=CC=C6)NC(OC(C)(C)C)=O)O)=O)O	114977-28-5	807.88
Doxercalciferol	S1467	C1[C@@H](C(/C(C[C@@H]1O)=C/C=C2\CCC[C@]3([C@]2(CC[C@]3([C@@H](/C=C/[C@H](C(C)C)C)C)[H])[H])C)=C)O	54573-75-0	412.65
Doxorubicin	S1208	C1(=CC=C2C(=C1OC)C(C3=C(C2=O)C(=C4C(=C3O)[C@@H](C[C@@](C4)(C(CO)=O)O)O[C@]5(C[C@@H]([C@@H]([C@@H](O5)C)O)N)[H])O)=O).Cl	25316-40-9	579.98
Epirubicin	S1223	C1(=CC=C2C(=C1OC)C(C3=C(C2=O)C(=C4C(=C3O)[C@@H](C[C@@](C4)(C(CO)=O)O)O[C@]5(C[C@@H]([C@H]([C@@H](O5)C)O)N)[H])O)=O).Cl	56390-09-1	579.98
Erlotinib	S1023	C1(=CC=CC(=C1)C#C)NC2(=NC=NC3=C2C=C(C(=C3)OCCOC)OCCOC).Cl	183319-69-9	429.9
Estradiol	S1709	C1C(=CC2=C(C=1)[C@]3([C@@](CC2)([C@]4([C@](CC3)([C@@H](CC4)O)C)[H])[H])[H])O	50-28-2	272.38
Estrone	S1665	C1=C(C=C2C(=C1)[C@]3([C@@](CC2)([C@]4([C@](CC3)(C(CC4)=O)C)[H])[H])[H])O	53-16-7	270.37
Etoposide	S1225	[C@@]12([C@@]([C@@H](C3=C([C@@H]1C4=CC(=C(C(=C4)OC)O)OC)C=C5C(=C3)OCO5)O[C@@]6(O[C@]7([C@]([C@@H]([C@@H]6O)O)(O[C@@H](OC7)C)[H])[H])[H])(COC2=O)[H])[H]	33419-42-0	588.56
Everolimus	S1120	C(O)CO[C@H]1[C@@H](C[C@@H](CC1)C[C@@H]([C@H]2OC(=O)[C@@H]3CCCCN3C(=O)C([C@]4([C@@H](CC[C@H](O4)C[C@@H](/C(=C/C=C/C=C/[C@H](C[C@H](C([C@@H]([C@@H](O)/C(=C/[C@H](C(C2)=O)C)C)OC)=O)C)C)C)OC)C)O)=O)C)OC	159351-69-6	958.22
Raloxifene	S1227	C1(C=CC2=C(C=1)SC(=C2C(C3=CC=C(C=C3)OCCN4CCCCC4)=O)C5=CC=C(C=C5)O)O.Cl	82640-04-8	510.04
Exemestane	S1196	C1(C=C[C@@]2([C@@]3(CC[C@]4(C(CC[C@@]([C@](CC(C(=C1)2)=C)3[H])4[H])=O)C)[H])C)=O	107868-30-4	296.4
Floxuridine	S1299	O1[C@@H]([C@H](C[C@H]1N2C=C(C(NC2=O)=O)F)O)CO	50-91-9	246.19
Fludarabine	S1491	O1[C@@H]([C@H]([C@@H]([C@H]1N2C3=C(N=C2)C(=NC(=N3)F)N)O)O)CO	21679-14-1	285.23
Flutamide	S1908	C1(=C(C=C(C=C1)NC(C(C)C)=O)C(F)(F)F)[N+](=O)[O-]	13311-84-7	276.21
Ftorafur	S1300	N1C(N(C=C(C1=O)F)[C@@H]2OCCC2)=O	17902-23-7	200.17
Fulvestrant	S1191	C1(C=CC2[C@@]3(CC[C@]4([C@H](CC[C@@]([C@]([C@@H](CC(C=1)=2)CCCCCCCCCS(=O)CCCC(C(F)(F)F)(F)F)3[H])4[H])O)C)[H])O	129453-61-8	606.77
Gefitinib	S1025	C1(=C(C=C2C(=C1)N=CN=C2NC3=CC=C(C(=C3)Cl)F)OCCCN4CCOCC4)OC	184475-35-2	446.9
Gemcitabine	S1714	N1=C(C=CN(C1=O)[C@@H]2O[C@@H]([C@H](C2(F)F)O)CO)N	95058-81-4	263.2
Hydroxyurea	S1896	N(C(N)=O)O	127-07-1	76.05
Idarubicin	S1228	C1(=CC=C2C(=C1)C(C3=C(C2=O)C(=C4C(=C3O)[C@@H](C[C@@](C4)(C(C)=O)O)O[C@@H]5O[C@H]([C@H]([C@H](C5)N)O)C)O)=O).Cl	57852-57-0	533.95
Ifosfamide	S1302	C1COP(N(C1)CCCl)(NCCCl)=O	3778-73-2	261.09
Imatinib	S2475	N1=C(N=C(C=C1)C2=CC=CN=C2)NC3=CC(=CC=C3C)NC(=O)C4=CC=C(C=C4)CN5CCN(CC5)C	152459-95-5	493.6
Irinotecan	S1198	N1(CCCCC1)C2CCN(CC2)C(=O)OC3=CC4=C(C5=C(N=C(C=C3)4)C6=CC7=C(C(N(C5)6)=O)COC([C@@]7(O)CC)=O)CC	97682-44-5	586.68
Isotretinoin	S1379	C(/C=C(\C=C\C=C(/C=C/C1=C(CCCC1(C)C)C)C)C)(=O)O	4759-48-2	300.44
Lapatinib	S2111	C1=C(C=C2C(=C1)N=CN=C2NC3=CC=C(C(=C3)Cl)OCC4=CC=CC(=C4)F)C5OC(=CC=5)CNCCS(=O)(C)=O	231277-92-2	581.06
Lenalidomide	S1029	C1=CC(=C2C(=C1)C(N(C2)C3C(NC(CC3)=O)=O)=O)N	191732-72-6	259.26
Letrozole	S1235	C1=CC(=CC=C1C(N2N=CN=C2)C3=CC=C(C=C3)C#N)C#N	112809-51-5	285.3
Lomustine	S1840	C1CCCC(C1)NC(N(CCCl)N=O)=O	13010-47-4	233.7
Lonidamine	S2610	C1=CC=C2C(=C1)N(N=C2C(O)=O)CC3=C(C=C(C=C3)Cl)Cl	50264-69-2	321.16
Masitinib	S1064	C1(=C(C=C(C=C1)NC(=O)C2=CC=C(C=C2)CN3CCN(CC3)C)NC4=NC(=CS4)C5=CC=CN=C5)C	790299-79-5	498.64
Enzalutamide	S1250	C1(=C(C=CC(=C1)N2C(N(C(C2(C)C)=O)C3=CC=C(C(=C3)C(F)(F)F)C#N)=S)C(NC)=O)F	915087-33-1	464.44
Megestrol	S1304	C1C(C=C2[C@](C1)([C@]3([C@@](C=C2C)([C@]4([C@](CC3)([C@@](CC4)(C(C)=O)OC(=O)C)C)[H])[H])[H])C)=O	595-33-5	384.51
Mercaptopurine	S1305	N1=CNC2=C(C1=S)NC=N2	50-44-2	152.18
Mitoxantrone	S2485	C1(=CC(=C2C(=C1O)C(C3=C(C2=O)C(=CC=C3NCCNCCO)NCCNCCO)=O)O).Cl.Cl	70476-82-3	517.4
Nelarabine	S1213	N1C(=NC2=C(C=1OC)N=CN2[C@H]3[C@H]([C@@H]([C@H](O3)CO)O)O)N	121032-29-9	297.27
Nilotinib	S1033	C1(=CC=C(C(=C1)NC2=NC=CC(=N2)C3=CN=CC=C3)C)C(=O)NC4=CC(=CC(=C4)N5C=C(N=C5)C)C(F)(F)F	641571-10-0	529.52
OSI-420	S2205	C1(=C(C=CC=C1NC2=NC=NC3=C2C=C(C(=C3)OCCOC)OCCO)C#C).Cl	183320-51-6	415.87
Oxaliplatin	S1224	[Pt+2].[O-]C(C([O-])=O)=O.C1CC[C@H]([C@@H](C1)N)N	61825-94-3	397.29
Paclitaxel	S1150	C1=CC=CC(=C1)C(=O)N[C@H]([C@H](C(O[C@H]2C[C@@]3(C(C(=C2C)[C@H](C(=O)[C@]4(C([C@]5([C@@H](C[C@H]4O)OC5)OC(C)=O)[C@@H]3OC(C6=CC=CC=C6)=O)C)OC(C)=O)(C)C)O)=O)O)C7=CC=CC=C7	33069-62-4	853.91
Pazopanib	S3012	C1(C(=CC=C(C=1)NC2N=C(C=CN=2)N(C)C3C=CC4=C(N(N=C(C=3)4)C)C)C)S(=O)(=O)N	444731-52-6	437.52
Ibrutinib	S2680	C1=NC(=C2C(=N1)N(N=C2C3=CC=C(C=C3)OC4=CC=CC=C4)[C@H]5CN(CCC5)C(C=C)=O)N	936563-96-1	440.5
Pomalidomide	S1567	C1=CC=C2C(=C1N)C(N(C2=O)C3C(NC(CC3)=O)=O)=O	19171-19-8	273.24
Ponatinib	S1490	C1C=NN2C(C=1)=NC=C2C#CC3=C(C=CC(=C3)C(=O)NC4=CC(=C(C=C4)CN5CCN(CC5)C)C(F)(F)F)C	943319-70-8	532.56
Rapamycin	S1039	[C@@H]1([C@@H](C[C@@H](CC1)C[C@H]([C@@H]2CC([C@@H](/C=C(\C)[C@H]([C@@H](C([C@@H](C[C@@H](/C=C/C=C/C=C(/[C@H](C[C@@H]3CC[C@H]([C@](C(C(N4CCCC[C@@H](C(O2)=O)4)=O)=O)(O3)O)C)OC)C)C)C)=O)OC)O)C)=O)C)OC)O	53123-88-9	914.18
Regorafenib	S1178	C1=NC(=CC(=C1)OC2=CC(=C(C=C2)NC(NC3=CC=C(C(=C3)C(F)(F)F)Cl)=O)F)C(=O)NC	755037-03-7	482.82
Ruxolitinib	S1378	N1=CN=C2C(=C1C3=CN(N=C3)[C@@H](CC#N)C4CCCC4)C=CN2	941678-49-5	306.37
Sorafenib	S1040	C1(=CC=C(C=C1C(F)(F)F)NC(NC2=CC=C(C=C2)OC3=CC=NC(=C3)C(NC)=O)=O)Cl.C4=CC(=CC=C4S(O)(=O)=O)C	475207-59-1	637.03
Streptozotocin	S1312	[C@H]1([C@@H]([C@H]([C@@H]([C@H](O1)CO)O)O)NC(N(N=O)C)=O)O	18883-66-4	265.22
Sunitinib	S1042	C1(=CC=C2C(=C1)/C(C(N2)=O)=C/C3NC(=C(C=3C)C(NCCN(CC)CC)=O)C)F.C(C[C@@H](C(O)=O)O)(O)=O	341031-54-7	532.56
TAME	S2225	C1=C(C=CC(=C1)S(N[C@H](C(OC)=O)CCCNC(=N)N)(=O)=O)C	901-47-3	342.41
Tamoxifen	S1972	C1(=CC=C(C=C1)/C(=C(/CC)C2=CC=CC=C2)C3=CC=CC=C3)OCCN(C)C.C(CC(CC(=O)O)(C(=O)O)O)(=O)O	54965-24-1	563.64
Temozolomide	S1237	N1(N=NC2N(C1=O)C=NC=2C(N)=O)C	85622-93-1	194.15
Temsirolimus	S1044	[C@H]1(C[C@@H](CC[C@@H]1OC(C(CO)(CO)C)=O)C[C@H]([C@@H]2CC([C@@H](/C=C(/[C@H]([C@@H](OC)C([C@@H](C[C@@H](/C=C/C=C/C=C(/[C@H](C[C@]3(CC[C@H]([C@](C(C(N4[C@](C(O2)=O)(CCCC4)[H])=O)=O)(O3)O)C)[H])OC)C)C)C)=O)O)C)C)=O)C)OC	162635-04-3	1030.29
Teniposide	S1787	C1=C2C(=CC3=C1OCO3)[C@@H]([C@@]4([C@@H]([C@@H]2O[C@H]5[C@@H]([C@H]([C@H]6[C@H](O5)CO[C@H](O6)C7=CC=CS7)O)O)COC4=O)[H])C8=CC(=C(C(=C8)OC)O)OC	29767-20-2	656.65
Thalidomide	S1193	C1(N(C(C2C=CC=CC1=2)=O)C3C(NC(CC3)=O)=O)=O	50-35-1	258.23
Topotecan	S1231	C1(C=CC2C(C=1CN(C)C)=CC3=C(N=2)C4N(C3)C(C5=C(C=4)[C@](C(OC5)=O)(CC)O)=O)O.Cl	119413-54-6	457.91
Toremifene	S1776	C1(=C(C=CC(=C1)/C(C2=CC=CC=C2)=C(\C3=CC=CC=C3)CCCl)OCCN(C)C).OC(CC(CC(=O)O)(C(=O)O)O)=O	89778-27-8	598.08
Tretinoin	S1653	C1CCC(=C(C1(C)C)/C=C/C(=C/C=C/C(=C/C(O)=O)C)C)C	302-79-4	300.4
Valproic acid	S1168	CCCC(C([O-])=O)CCC.[Na+]	1069-66-5	166.19
Vandetanib	S1046	C12=C(C(=NC=N1)NC3=C(C=C(C=C3)Br)F)C=C(C(=C2)OCC4CCN(CC4)C)OC	443913-73-3	475.35
Vemurafenib	S1267	C1(=CN=C2C(=C1)C(=CN2)C(=O)C3=C(C(=CC=C3F)NS(=O)(=O)CCC)F)C4=CC=C(C=C4)Cl	918504-65-1	489.92
Vinblastine	S1248	C123[C@]4(N(CC1)CC=C[C@@]4(CC)[C@@H]([C@]([C@@]2(N(C5C3=CC(=C(C=5)OC)[C@@]6(C7NC8=CC=CC=C8C=7CC[N@]9C[C@](C[C@](C6)([H])C9)(O)CC)C(OC)=O)C=O)[H])(O)C(=O)OC)OC(=O)C)[H]	57-22-7	824.96
Vincristine	S1241	C1(=CC2=C(C=C1[C@@]3(C4=C(C5=C(N4)C=CC=C5)CCN6C[C@](C3)(C[C@@](C6)(O)CC)[H])C(OC)=O)[C@]78[C@@](N2C=O)([C@]([C@@H]([C@]9([C@@]7(N(CC8)CC=C9)[H])CC)OC(=O)C)(C(OC)=O)O)[H])OC.S(=O)(=O)(O)O	2068-78-2	923.04
Vinorelbine	S4269	C1(=C(C=C2C(=C1)[C@]34[C@@](N2C)([C@]([C@@H]([C@]5([C@]3(N(CC=C5)CC4)[H])CC)OC(C)=O)(C(OC)=O)O)[H])OC)[C@]6(CC7C=C(C[N@@](C7)CC8=C6NC9=C8C=CC=C9)CC)C(OC)=O.C([C@@H]([C@H](C(O)=O)O)O)(O)=O.C([C@@H]([C@H](C(O)=O)O)O)(O)=O	125317-39-7	1079.11
Vismodegib	S1082	C1(=C(C=C(C=C1)NC(C2=CC=C(C=C2Cl)S(C)(=O)=O)=O)C3=NC=CC=C3)Cl	879085-55-9	421.3
Vorinostat	S1047	C1=CC=CC(=C1)NC(=O)CCCCCCC(NO)=O	149647-78-9	264.3
Zileuton	S1443	C1=CC=C2C(=C1)SC(=C2)C(N(O)C(N)=O)C	111406-87-2	236.29

## Sheet: FDA drug targets
target	Affymetrix probeset ID	therapy	source	notes	status
ABCB1	209993_at	Sunitinib	Shukla,S et al. Sunitinib (Sutent, SU11248), a Small-Molecule Receptor Tyrosine Kinase Inhibitor, Blocks Function of the ATP-Binding Cassette (ABC) Transporters P-Glycoprotein (ABCB1) and ABCG2. Drug Metab Dispos. 2009 February; 37(2): 359–365	for renal cell carcinoma, GIST	FDA approved
ABCC1	202804_at	Ibrutinib	http://www.cancer.gov/cancertopics/factsheet/Therapy/targeted	for B-cell cxs; shown by Zhang H 2014 to inhibit ABCC1 aka MRP1 drug eflux	FDA approved
ABCG2	209735_at	Sunitinib	Shukla,S et al. Sunitinib (Sutent, SU11248), a Small-Molecule Receptor Tyrosine Kinase Inhibitor, Blocks Function of the ATP-Binding Cassette (ABC) Transporters P-Glycoprotein (ABCB1) and ABCG2. Drug Metab Dispos. 2009 February; 37(2): 359–365	for renal cell carcinoma, GIST	FDA approved
ABL1	202123_s_at	Bosutinib	http://www.cancer.gov/cancertopics/factsheet/Therapy/targeted	for same cx as gleevec	FDA approved
ABL1	202123_s_at	Dasatinib	http://www.flexyx.com/S/Sprycel.html	for CML, ALL, others	FDA approved
ABL1	202123_s_at	Imatinib mesylate	http://www.glivec.com/about-glivec/molecular-targets.jsp	for CML, ALL, GIST	FDA approved
ABL1	202123_s_at	Nilotinib	Tiwari AK, et al. Nilotinib (AMN107, Tasigna) reverses multidrug resistance by inhibiting the activity of the ABCB1/Pgp and ABCG2/BCRP/MXR transporters. Biochem Pharmacol. 2009 Jul 15;78(2):153-61.	nilotinib potentiates the cytotoxicity of widely used therapeutic substrates of ABCG2, such as mitoxantrone, doxorubicin, and ABCB1 substrates including colchicine, vincristine, and paclitaxel; inhibition of the ABCG2-mediated transport of methotrexate; for CML	FDA approved
ABL1	202123_s_at	Ponatinib	http://www.cancer.gov/drugdictionary?CdrID=595060	for BCR-ABL ALL and CML	FDA approved
ABL1	202123_s_at	Regorafenib	http://www.cancer.gov/cancertopics/factsheet/Therapy/targeted	broad RTK inhibitor which suppresses metastasis, angiogenesis, and oncognesis; for colorectal cx	FDA approved
ABL2	226893_at	Imatinib mesylate	http://www.glivec.com/about-glivec/molecular-targets.jsp	for CML, ALL, GIST	FDA approved
ADA	204639_at	Pentostatin	IPA	for leukemia	FDA approved
ALK	208212_s_at	Ceritinib	http://www.cancer.gov/cancertopics/factsheet/Therapy/targeted	for NSCLC	FDA approved
ALK	208212_s_at	Crizotinib	http://www.cancer.gov/cancertopics/factsheet/Therapy/targeted	for NSCLC	FDA approved
ALK	208212_s_at	Alectinib	http://www.cancer.gov/clinicaltrials/search/results?protocolsearchid=10682980	NSCLC and assoc'd brain mets	FDA approved
AR	226192_at	Enzalutamide	http://www.cancer.gov/cancertopics/factsheet/Therapy/targeted	for prostate cancer; blocks androgen production	FDA approved
AXL	202686_s_at	Cabozantinib	http://www.cancer.gov/cancertopics/factsheet/Therapy/targeted	broad RTK inhibitor which suppresses metastasis, angiogenesis, and oncognesis; for medullary thyroid cx	FDA approved
B4GALNT1	206435_at	Dinutuximab	http://wayback.archive-it.org/7993/20170111064250/http://www.fda.gov/Drugs/InformationOnDrugs/ApprovedDrugs/ucm279174.htm	neuroblastoma	FDA approved
BCL2	203685_at	venetoclax	https://www.fda.gov/Drugs/InformationOnDrugs/ApprovedDrugs/ucm279174.htm	CLL	FDA approved
BRAF	236402_at	Dabrafenib	http://www.cancer.gov/cancertopics/factsheet/Therapy/targeted	for melanoma with BRAF V600E mut	FDA approved
BRAF	236402_at	Regorafenib	http://www.cancer.gov/cancertopics/factsheet/Therapy/targeted	broad RTK inhibitor which suppresses metastasis, angiogenesis, and oncognesis; for colorectal cx	FDA approved
BRAF	236402_at	Vemurafenib	IPA	mutatated BRAF (V600E) positive melanoma	FDA approved
BTK	205504_at	Ibrutinib	http://www.cancer.gov/cancertopics/factsheet/Therapy/targeted	for B-cell cxs; shown by Zhang H 2014 to inhibit ABCC1 aka MRP1 drug eflux	FDA approved
CD19	206398_s_at	Blinatumomab	http://www.cancer.gov/cancertopics/factsheet/Therapy/targeted	for ALL cx	FDA approved
CD274	227458_at	Nivolumab	http://www.cancer.gov/cancertopics/factsheet/Therapy/targeted	for melanoma	FDA approved
CD274	227458_at	Pembrolizumab	http://www.cancer.gov/cancertopics/factsheet/Therapy/targeted	for melanoma	FDA approved
CD274	227458_at	atezolizumab	https://www.fda.gov/Drugs/InformationOnDrugs/ApprovedDrugs/ucm279174.htm	NSCLC	FDA approved
CD38	205692_s_at	Daratumumab	https://www.fda.gov/Drugs/InformationOnDrugs/ApprovedDrugs/ucm279174.htm	multiple myeloma	FDA approved
CD52	204661_at	Alemtuzumab	http://www.cancer.gov/cancertopics/factsheet/Therapy/targeted	for B-cell chronic lymphocytic leukemia	FDA approved
CDK4	202246_s_at	Palbociclib isethionate	aka PD-0332991, http://en.wikipedia.org/wiki/Targeted_therapy	many trials for solid tumors, including Phase I (as of jan 2015) for treating younger patients with central nervous system tumors (ages 4-21)	FDA approved
CDK4	202246_s_at	ribociclib	https://www.fda.gov/Drugs/InformationOnDrugs/ApprovedDrugs/ucm279174.htm	BC	FDA approved
CDK6	224847_at	Palbociclib isethionate	aka PD-0332991, http://en.wikipedia.org/wiki/Targeted_therapy	many trials for solid tumors, including Phase I (as of jan 2015) for treating younger patients with central nervous system tumors (ages 4-21)	FDA approved
CDK6	224847_at	ribociclib	https://www.fda.gov/Drugs/InformationOnDrugs/ApprovedDrugs/ucm279174.htm	BC	FDA approved
CRBN	222533_at	Pomalidomide	http://www.cancer.gov/cancertopics/factsheet/Therapy/targeted	for multiple myeloma	FDA approved
CSF1R	203104_at	Imatinib mesylate	http://www.glivec.com/about-glivec/molecular-targets.jsp	for CML, ALL, GIST	FDA approved
CSF1R	203104_at	Sunitinib	Shukla,S et al. Sunitinib (Sutent, SU11248), a Small-Molecule Receptor Tyrosine Kinase Inhibitor, Blocks Function of the ATP-Binding Cassette (ABC) Transporters P-Glycoprotein (ABCB1) and ABCG2. Drug Metab Dispos. 2009 February; 37(2): 359–365	for renal cell carcinoma, GIST	FDA approved
CTLA4	231794_at	Ipilimumab	http://www.cancer.gov/cancertopics/factsheet/Therapy/targeted	for melanoma	FDA approved
CYP17A1	1562573_at	Abiraterone	http://www.cancer.gov/drugdictionary?CdrID=552704	blocks testosterone production; for prostate cancer	FDA approved
CYP19A1	1554296_at	Anastrozole	http://www.cancer.gov/cancertopics/factsheet/Therapy/targeted	for breast cx; blocks estrogen production by blocking aromatase enzyme	FDA approved
CYP19A1	1554296_at	Exemestane	http://www.cancer.gov/cancertopics/factsheet/Therapy/targeted	for breast cx; blocks estrogen production by blocking aromatase enzyme	FDA approved
CYP19A1	1554296_at	Letrozole	http://www.cancer.gov/cancertopics/factsheet/Therapy/targeted	for breast cx; blocks estrogen production by blocking aromatase enzyme	FDA approved
DDR2	225442_at	Regorafenib	http://www.cancer.gov/cancertopics/factsheet/Therapy/targeted	broad RTK inhibitor which suppresses metastasis, angiogenesis, and oncognesis; for colorectal cx	FDA approved
DDR2	225442_at	Sorafenib	https://www.ncbi.nlm.nih.gov/pubmed/23279183	broad RTK inhibitor which suppresses metastasis, angiogenesis, and oncognesis; for colorectal cx	FDA approved
DDR2	225442_at	Nilotinib	https://www.ncbi.nlm.nih.gov/pubmed/23279183	broad RTK inhibitor which suppresses metastasis, angiogenesis, and oncognesis; for colorectal cx	FDA approved
DHFR	202534_x_at	5-fluorouracil	IPA		FDA approved
DHFR	202534_x_at	Floxuridine	IPA		FDA approved
DHFR	202534_x_at	Methotrexate	IPA		FDA approved
DHFR	202534_x_at	Pemetrexed	IPA	aka LY231514, for mesothelioma and NSCLC	FDA approved
DHFR	202534_x_at	Pralatrexate	http://www.cancer.gov/cancertopics/factsheet/Therapy/targeted	for peripheral T-cell lymphoma	FDA approved
EGFR	224999_at	Afatinib dimaleate	http://www.cancer.gov/cancertopics/factsheet/Therapy/targeted	for breast cx	FDA approved
EGFR	224999_at	Cetuximab	http://www.cancer.gov/cancertopics/factsheet/Therapy/targeted	for head & neck, colorectal cancer	FDA approved
EGFR	224999_at	Erlotinib	http://www.cancer.gov/cancertopics/factsheet/Therapy/targeted	for NSCLC, pancreatic, other	FDA approved
EGFR	224999_at	Gefitinib	http://www.cancer.gov/cancertopics/factsheet/Therapy/targeted	for breast, lung and other cancers	FDA approved
EGFR	224999_at	Lapatinib	http://www.pharmgkb.org/do/serve?objId=PA152241907&objCls=Drug		FDA approved
EGFR	224999_at	Panitumumab	http://www.cancer.gov/cancertopics/factsheet/Therapy/targeted	for colorectal cx	FDA approved
EGFR	224999_at	Vandetanib	IPA	thyroid cancer	FDA approved
EPHA2	203499_at	Dasatinib	http://www.flexyx.com/S/Sprycel.html	for CML, ALL, others	FDA approved
EPHA2	203499_at	Regorafenib	http://www.cancer.gov/cancertopics/factsheet/Therapy/targeted	broad RTK inhibitor which suppresses metastasis, angiogenesis, and oncognesis; for colorectal cx	FDA approved
ERBB2	216836_s_at	Ado-trastuzumab emtansine	http://www.cancer.gov/cancertopics/factsheet/Therapy/targeted	for breast cx	FDA approved
ERBB2	216836_s_at	Afatinib dimaleate	http://www.cancer.gov/cancertopics/factsheet/Therapy/targeted	for breast cx	FDA approved
ERBB2	216836_s_at	Erlotinib	http://www.cancer.gov/cancertopics/factsheet/Therapy/targeted	for NSCLC, pancreatic, other	FDA approved
ERBB2	216836_s_at	Lapatinib	http://www.pharmgkb.org/do/serve?objId=PA152241907&objCls=Drug		FDA approved
ERBB2	216836_s_at	Pertuzumab	http://www.cancer.gov/cancertopics/factsheet/Therapy/targeted	for breast cx	FDA approved
ERBB2	216836_s_at	Trastuzumab	http://www.cancer.gov/cancertopics/factsheet/Therapy/targeted		FDA approved
ERBB3	226213_at	Lapatinib	http://www.pharmgkb.org/do/serve?objId=PA152241907&objCls=Drug		FDA approved
ESR1	211627_x_at	Fulvestrant	http://www.cancer.gov/cancertopics/factsheet/Therapy/targeted	for breast cancers	FDA approved
ESR1	211627_x_at	Raloxifene	http://www.cancer.gov/cancertopics/factsheet/Therapy/targeted	is ER agonist in bone but antagonist in uterine & breast;for breast cancers	FDA approved
ESR1	211627_x_at	Tamoxifen	http://www.cancer.gov/cancertopics/factsheet/Therapy/targeted	for breast cancers	FDA approved
ESR2	211119_at	Fulvestrant	http://www.cancer.gov/cancertopics/factsheet/Therapy/targeted	for breast cancers	FDA approved
ESR2	211119_at	Raloxifene	http://www.cancer.gov/cancertopics/factsheet/Therapy/targeted	is ER agonist in bone but antagonist in uterine & breast;for breast cancers	FDA approved
ESR2	211119_at	Tamoxifen	http://www.cancer.gov/cancertopics/factsheet/Therapy/targeted	for breast cancers	FDA approved
FGFR1	211535_s_at	Lenvatinib	https://www.centerwatch.com/drug-information/fda-approved-drugs/therapeutic-area/12/oncology	thyroid cancer	FDA approved
FGFR1	211535_s_at	Pazopanib	http://www.cancer.gov/cancertopics/factsheet/Therapy/targeted	for renal cell cx and sarcoma	FDA approved
FGFR1	211535_s_at	Ponatinib	http://www.cancer.gov/drugdictionary?CdrID=595060	for BCR-ABL ALL and CML	FDA approved
FGFR1	211535_s_at	Regorafenib	http://www.cancer.gov/cancertopics/factsheet/Therapy/targeted	broad RTK inhibitor which suppresses metastasis, angiogenesis, and oncognesis; for colorectal cx	FDA approved
FGFR2	203638_s_at	Lenvatinib	https://www.centerwatch.com/drug-information/fda-approved-drugs/therapeutic-area/12/oncology	thyroid cancer	FDA approved
FGFR2	203638_s_at	Regorafenib	http://www.cancer.gov/cancertopics/factsheet/Therapy/targeted	broad RTK inhibitor which suppresses metastasis, angiogenesis, and oncognesis; for colorectal cx	FDA approved
FGFR3	204379_s_at	Lenvatinib	https://www.centerwatch.com/drug-information/fda-approved-drugs/therapeutic-area/12/oncology	thyroid cancer	FDA approved
FGFR3	204379_s_at	Pazopanib	http://www.cancer.gov/cancertopics/factsheet/Therapy/targeted	for renal cell cx and sarcoma	FDA approved
FGFR4	204579_at	Lenvatinib	https://www.centerwatch.com/drug-information/fda-approved-drugs/therapeutic-area/12/oncology	thyroid cancer	FDA approved
FIGF	206742_at	Ramucirumab	http://www.cancer.gov/cancertopics/factsheet/Therapy/targeted	selective for KDR (aka VEGFR2); anti-angiogenic; for NSCLC and gastric cancer; VEGFD = FIGF; but Affy has a dual gene name	FDA approved
FKBP1A	200709_at	Everolimus	http://www.cancer.gov/cancertopics/factsheet/Therapy/targeted	formerly FRAP1	FDA approved
FLT1	222033_s_at	Axitinib	IPA	for renal cell carcinoma	FDA approved
FLT1	222033_s_at	Bevacizumab	http://www.cancer.gov/cancertopics/factsheet/Therapy/targeted	anti-angiogenesis; targets VEGF, so good if VEGF receptors (FLT*) are up	FDA approved
FLT1	222033_s_at	Cabozantinib	http://www.cancer.gov/cancertopics/factsheet/Therapy/targeted	broad RTK inhibitor which suppresses metastasis, angiogenesis, and oncognesis; for medullary thyroid cx	FDA approved
FLT1	222033_s_at	Lenvatinib	https://www.centerwatch.com/drug-information/fda-approved-drugs/therapeutic-area/12/oncology	thyroid cancer	FDA approved
FLT1	222033_s_at	Pazopanib	http://www.cancer.gov/cancertopics/factsheet/Therapy/targeted	for renal cell cx and sarcoma	FDA approved
FLT1	222033_s_at	Regorafenib	http://www.cancer.gov/cancertopics/factsheet/Therapy/targeted	broad RTK inhibitor which suppresses metastasis, angiogenesis, and oncognesis; for colorectal cx	FDA approved
FLT1	222033_s_at	Sunitinib	Shukla,S et al. Sunitinib (Sutent, SU11248), a Small-Molecule Receptor Tyrosine Kinase Inhibitor, Blocks Function of the ATP-Binding Cassette (ABC) Transporters P-Glycoprotein (ABCB1) and ABCG2. Drug Metab Dispos. 2009 February; 37(2): 359–365	for renal cell carcinoma, GIST	FDA approved
FLT3	206674_at	Cabozantinib	http://www.cancer.gov/cancertopics/factsheet/Therapy/targeted	broad RTK inhibitor which suppresses metastasis, angiogenesis, and oncognesis; for medullary thyroid cx	FDA approved
FLT3	206674_at	Ponatinib	http://www.cancer.gov/drugdictionary?CdrID=595060	for BCR-ABL ALL and CML	FDA approved
FLT3	206674_at	Regorafenib	http://www.cancer.gov/cancertopics/factsheet/Therapy/targeted	broad RTK inhibitor which suppresses metastasis, angiogenesis, and oncognesis; for colorectal cx	FDA approved
FLT3	206674_at	Sunitinib	Shukla,S et al. Sunitinib (Sutent, SU11248), a Small-Molecule Receptor Tyrosine Kinase Inhibitor, Blocks Function of the ATP-Binding Cassette (ABC) Transporters P-Glycoprotein (ABCB1) and ABCG2. Drug Metab Dispos. 2009 February; 37(2): 359–365	for renal cell carcinoma, GIST	FDA approved
FLT4	210316_at	Axitinib	IPA	for renal cell carcinoma	FDA approved
FLT4	210316_at	Bevacizumab	http://www.cancer.gov/cancertopics/factsheet/Therapy/targeted	anti-angiogenesis; targets VEGF, so good if VEGF receptors (FLT*) are up	FDA approved
FLT4	210316_at	Cabozantinib	http://www.cancer.gov/cancertopics/factsheet/Therapy/targeted	broad RTK inhibitor which suppresses metastasis, angiogenesis, and oncognesis; for medullary thyroid cx	FDA approved
FLT4	210316_at	Lenvatinib	https://www.centerwatch.com/drug-information/fda-approved-drugs/therapeutic-area/12/oncology	thyroid cancer	FDA approved
FLT4	210316_at	Pazopanib	http://www.cancer.gov/cancertopics/factsheet/Therapy/targeted	for renal cell cx and sarcoma	FDA approved
FLT4	210316_at	Regorafenib	http://www.cancer.gov/cancertopics/factsheet/Therapy/targeted	broad RTK inhibitor which suppresses metastasis, angiogenesis, and oncognesis; for colorectal cx	FDA approved
FLT4	210316_at	Sorafenib	Wilhelm SM et al. Preclinical overview of sorafenib, a multikinase inhibitor that targets both Raf and VEGF and PDGF receptor tyrosine kinase signaling. Mol Cancer Ther October 2008 7; 3129	for renal cell carcinoma	FDA approved
FLT4	210316_at	Sunitinib	Shukla,S et al. Sunitinib (Sutent, SU11248), a Small-Molecule Receptor Tyrosine Kinase Inhibitor, Blocks Function of the ATP-Binding Cassette (ABC) Transporters P-Glycoprotein (ABCB1) and ABCG2. Drug Metab Dispos. 2009 February; 37(2): 359–365	for renal cell carcinoma, GIST	FDA approved
FPGS	202945_at	Pralatrexate	http://www.cancer.gov/cancertopics/factsheet/Therapy/targeted	for peripheral T-cell lymphoma	FDA approved
FRK	207178_s_at	Regorafenib	http://www.cancer.gov/cancertopics/factsheet/Therapy/targeted	broad RTK inhibitor which suppresses metastasis, angiogenesis, and oncognesis; for colorectal cx	FDA approved
FUS	200959_at	Trabectedin	https://www.fda.gov/Drugs/InformationOnDrugs/ApprovedDrugs/ucm279174.htm	soft tissue sarcoma	FDA approved
FYN	210105_s_at	Dasatinib	http://www.flexyx.com/S/Sprycel.html	for CML, ALL, others	FDA approved
GART	212378_at	Pemetrexed	IPA	aka LY231514, for mesothelioma and NSCLC	FDA approved
GNRHR	211522_s_at	Lanreotide acetate	http://www.cancer.gov/cancertopics/factsheet/Therapy/targeted	receptor agonist that ends up reducing androgen and estrogen levels	FDA approved
HCK	208018_s_at	Bosutinib	http://www.cancer.gov/cancertopics/factsheet/Therapy/targeted	for same cx as gleevec	FDA approved
HDAC1	201209_at	Belinostat	IPA	for peripheral T-cell lymphoma (PTCL)	FDA approved
HDAC1	201209_at	Panobinostat	https://www.centerwatch.com/drug-information/fda-approved-drugs/therapeutic-area/12/oncology	multiple myeloma	FDA approved
HDAC1	201209_at	Romidepsin	IPA		FDA approved
HDAC1	201209_at	Vorinostat	http://www.cancer.gov/cancertopics/factsheet/Therapy/targeted	aka SAHA, for cutaneous T cell lymphoma	FDA approved
HDAC2	201833_at	Belinostat	IPA	for peripheral T-cell lymphoma (PTCL)	FDA approved
HDAC2	201833_at	Panobinostat	https://www.centerwatch.com/drug-information/fda-approved-drugs/therapeutic-area/12/oncology	multiple myeloma	FDA approved
HDAC2	201833_at	Romidepsin	IPA		FDA approved
HDAC2	201833_at	Vorinostat	http://www.cancer.gov/cancertopics/factsheet/Therapy/targeted	aka SAHA, for cutaneous T cell lymphoma	FDA approved
HRAS	212983_at	Sorafenib	Wilhelm SM et al. Preclinical overview of sorafenib, a multikinase inhibitor that targets both Raf and VEGF and PDGF receptor tyrosine kinase signaling. Mol Cancer Ther October 2008 7; 3129	for renal cell carcinoma	FDA approved
HSP90B1	216449_x_at	17-DMAG	IPA	17-dimethylaminoethylamino-17-demethoxygeldanamycin	FDA approved
HSP90B1	216449_x_at	Cisplatin	IPA		FDA approved
IGF1R	225330_at	Ceritinib	http://www.cancer.gov/cancertopics/factsheet/Therapy/targeted	for NSCLC	FDA approved
IL2RA	206341_at	Denileukin diftitox	http://www.cancer.gov/cancertopics/factsheet/Therapy/targeted	binds to IL-2 receptors; is bound to diptheria toxin, for CD-25 positive cutaneous T-cell lymphoma	FDA approved
IL2RB	205291_at	Denileukin diftitox	http://www.cancer.gov/cancertopics/factsheet/Therapy/targeted	binds to IL-2 receptors; is bound to diptheria toxin, for CD-25 positive cutaneous T-cell lymphoma	FDA approved
IL2RG	204116_at	Denileukin diftitox	http://www.cancer.gov/cancertopics/factsheet/Therapy/targeted	binds to IL-2 receptors; is bound to diptheria toxin, for CD-25 positive cutaneous T-cell lymphoma	FDA approved
IL6	205207_at	Siltuximab	http://www.cancer.gov/cancertopics/factsheet/Therapy/targeted	various cxs	FDA approved
IL6R	226333_at	Siltuximab	http://www.cancer.gov/cancertopics/factsheet/Therapy/targeted	various cxs	FDA approved
IMPDH2	201892_s_at	Interferon alfa-2b	IPA	for leukemias and lymphomas, skin melanomas, and Kaposi sarcoma	FDA approved
IMPDH2	201892_s_at	Thioguanine	IPA	for leukemia	FDA approved
JAK1	201648_at	Ruxolitinib phosphate	http://www.cancer.gov/cancertopics/factsheet/Therapy/targeted	bone marrow cxs	FDA approved
JAK2	205841_at	Ruxolitinib phosphate	http://www.cancer.gov/cancertopics/factsheet/Therapy/targeted	bone marrow cxs	FDA approved
KDR	203934_at	Axitinib	IPA	for renal cell carcinoma	FDA approved
KDR	203934_at	Bevacizumab	http://www.cancer.gov/cancertopics/factsheet/Therapy/targeted	anti-angiogenesis; targets VEGF, so good if VEGF receptors (FLT*) are up	FDA approved
KDR	203934_at	Cabozantinib	http://www.cancer.gov/cancertopics/factsheet/Therapy/targeted	broad RTK inhibitor which suppresses metastasis, angiogenesis, and oncognesis; for medullary thyroid cx	FDA approved
KDR	203934_at	Lenvatinib	https://www.centerwatch.com/drug-information/fda-approved-drugs/therapeutic-area/12/oncology	thyroid cancer	FDA approved
KDR	203934_at	Pazopanib	http://www.cancer.gov/cancertopics/factsheet/Therapy/targeted	for renal cell cx and sarcoma	FDA approved
KDR	203934_at	Ramucirumab	http://www.cancer.gov/cancertopics/factsheet/Therapy/targeted	selective for KDR (aka VEGFR2); anti-angiogenic; for NSCLC and gastric cancer	FDA approved
KDR	203934_at	Regorafenib	http://www.cancer.gov/cancertopics/factsheet/Therapy/targeted	broad RTK inhibitor which suppresses metastasis, angiogenesis, and oncognesis; for colorectal cx	FDA approved
KDR	203934_at	Sorafenib	Wilhelm SM et al. Preclinical overview of sorafenib, a multikinase inhibitor that targets both Raf and VEGF and PDGF receptor tyrosine kinase signaling. Mol Cancer Ther October 2008 7; 3129	for renal cell carcinoma	FDA approved
KDR	203934_at	Sunitinib	Shukla,S et al. Sunitinib (Sutent, SU11248), a Small-Molecule Receptor Tyrosine Kinase Inhibitor, Blocks Function of the ATP-Binding Cassette (ABC) Transporters P-Glycoprotein (ABCB1) and ABCG2. Drug Metab Dispos. 2009 February; 37(2): 359–365	for renal cell carcinoma, GIST	FDA approved
KDR	203934_at	Vandetanib	IPA	thyroid cancer	FDA approved
KIT	205051_s_at	Axitinib	IPA	for renal cell carcinoma	FDA approved
KIT	205051_s_at	Cabozantinib	http://www.cancer.gov/cancertopics/factsheet/Therapy/targeted	broad RTK inhibitor which suppresses metastasis, angiogenesis, and oncognesis; for medullary thyroid cx	FDA approved
KIT	205051_s_at	Dasatinib	http://www.flexyx.com/S/Sprycel.html	for CML, ALL, others	FDA approved
KIT	205051_s_at	Imatinib mesylate	http://www.glivec.com/about-glivec/molecular-targets.jsp	for CML, ALL, GIST	FDA approved
KIT	205051_s_at	Lenvatinib	https://www.centerwatch.com/drug-information/fda-approved-drugs/therapeutic-area/12/oncology	thyroid cancer	FDA approved
KIT	205051_s_at	Pazopanib	http://www.cancer.gov/cancertopics/factsheet/Therapy/targeted	for renal cell cx and sarcoma	FDA approved
KIT	205051_s_at	Ponatinib	http://www.cancer.gov/drugdictionary?CdrID=595060	for BCR-ABL ALL and CML	FDA approved
KIT	205051_s_at	Regorafenib	http://www.cancer.gov/cancertopics/factsheet/Therapy/targeted	broad RTK inhibitor which suppresses metastasis, angiogenesis, and oncognesis; for colorectal cx	FDA approved
KIT	205051_s_at	Sorafenib	Wilhelm SM et al. Preclinical overview of sorafenib, a multikinase inhibitor that targets both Raf and VEGF and PDGF receptor tyrosine kinase signaling. Mol Cancer Ther October 2008 7; 3129	for renal cell carcinoma	FDA approved
KIT	205051_s_at	Sunitinib	Shukla,S et al. Sunitinib (Sutent, SU11248), a Small-Molecule Receptor Tyrosine Kinase Inhibitor, Blocks Function of the ATP-Binding Cassette (ABC) Transporters P-Glycoprotein (ABCB1) and ABCG2. Drug Metab Dispos. 2009 February; 37(2): 359–365	for renal cell carcinoma, GIST	FDA approved
KRAS	204009_s_at	Sorafenib	Wilhelm SM et al. Preclinical overview of sorafenib, a multikinase inhibitor that targets both Raf and VEGF and PDGF receptor tyrosine kinase signaling. Mol Cancer Ther October 2008 7; 3129	for renal cell carcinoma	FDA approved
LCK	204891_s_at	Dasatinib	http://www.flexyx.com/S/Sprycel.html	for CML, ALL, others	FDA approved
LCK	204891_s_at	Pazopanib	http://www.cancer.gov/cancertopics/factsheet/Therapy/targeted	for renal cell cx and sarcoma	FDA approved
LIMK1	204357_s_at	Dabrafenib	http://www.cancer.gov/cancertopics/factsheet/Therapy/targeted	for melanoma with BRAF V600E mut	FDA approved
LTK	207106_s_at	Pazopanib	http://www.cancer.gov/cancertopics/factsheet/Therapy/targeted	for renal cell cx and sarcoma	FDA approved
LYN	202625_at	Bosutinib	http://www.cancer.gov/cancertopics/factsheet/Therapy/targeted	for same cx as gleevec	FDA approved
MAP2K1	202670_at	Trametinib	http://www.cancer.gov/cancertopics/factsheet/Therapy/targeted	aka MEK1 & MEK2; for melanoma with BRAF V600E or K muts	FDA approved
MAP2K2	202424_at	Trametinib	http://www.cancer.gov/cancertopics/factsheet/Therapy/targeted	aka MEK1 & MEK2; for melanoma with BRAF V600E or K muts	FDA approved
MAP4K5	203552_at	Vemurafenib	IPA	mutatated BRAF (V600E) positive melanoma	FDA approved
MAPK11	211499_s_at	Regorafenib	http://www.cancer.gov/cancertopics/factsheet/Therapy/targeted	broad RTK inhibitor which suppresses metastasis, angiogenesis, and oncognesis; for colorectal cx	FDA approved
MAPK14	202530_at	Regorafenib	http://www.cancer.gov/cancertopics/factsheet/Therapy/targeted	broad RTK inhibitor which suppresses metastasis, angiogenesis, and oncognesis; for colorectal cx	FDA approved
MET	203510_at	Cabozantinib	http://www.cancer.gov/cancertopics/factsheet/Therapy/targeted	broad RTK inhibitor which suppresses metastasis, angiogenesis, and oncognesis; for medullary thyroid cx	FDA approved
MET	203510_at	Ceritinib	http://www.cancer.gov/cancertopics/factsheet/Therapy/targeted	for NSCLC	FDA approved
MET	203510_at	Crizotinib	http://www.cancer.gov/cancertopics/factsheet/Therapy/targeted	for NSCLC	FDA approved
MRAS	225185_at	Sorafenib	Wilhelm SM et al. Preclinical overview of sorafenib, a multikinase inhibitor that targets both Raf and VEGF and PDGF receptor tyrosine kinase signaling. Mol Cancer Ther October 2008 7; 3129	for renal cell carcinoma	FDA approved
MS4A1	228592_at	Ibritumomab tiuxetan	http://www.cancer.gov/cancertopics/factsheet/Therapy/targeted	for B-cell cxs	FDA approved
MS4A1	228592_at	Obinutuzumab	http://www.cancer.gov/cancertopics/factsheet/Therapy/targeted	binds to type II MS4A1 (aka CD20) antibodies; for B-cell Cxs particularly CLL	FDA approved
MS4A1	228592_at	Ofatumumab	http://www.cancer.gov/cancertopics/factsheet/Therapy/targeted	for B-cell cxs	FDA approved
MS4A1	228592_at	Rituximab	http://www.cancer.gov/cancertopics/factsheet/Therapy/targeted	for B-cell cxs	FDA approved
MS4A1	228592_at	obinutuzumab	https://www.fda.gov/Drugs/InformationOnDrugs/ApprovedDrugs/ucm279174.htm	follicular lymphoma	FDA approved
MS4A1	228592_at	ofatumumab	https://www.fda.gov/Drugs/InformationOnDrugs/ApprovedDrugs/ucm279174.htm	follicular lymphoma	FDA approved
MST1R	205455_at	Crizotinib	http://www.cancer.gov/cancertopics/factsheet/Therapy/targeted	for NSCLC	FDA approved
MST1R	205455_at	Pazopanib	http://www.cancer.gov/cancertopics/factsheet/Therapy/targeted	for renal cell cx and sarcoma	FDA approved
MTOR	202288_at	Everolimus	http://www.cancer.gov/cancertopics/factsheet/Therapy/targeted	formerly FRAP1	FDA approved
MTOR	202288_at	Temsirolimus	http://www.cancer.gov/cancertopics/factsheet/Therapy/targeted	formerly FRAP1, for renal cell carcinoma	FDA approved
NEK11	219542_at	Dabrafenib	http://www.cancer.gov/cancertopics/factsheet/Therapy/targeted	for melanoma with BRAF V600E mut	FDA approved
NRAS	224985_at	Sorafenib	Wilhelm SM et al. Preclinical overview of sorafenib, a multikinase inhibitor that targets both Raf and VEGF and PDGF receptor tyrosine kinase signaling. Mol Cancer Ther October 2008 7; 3129	for renal cell carcinoma	FDA approved
NTRK1	208605_s_at	Regorafenib	http://www.cancer.gov/cancertopics/factsheet/Therapy/targeted	broad RTK inhibitor which suppresses metastasis, angiogenesis, and oncognesis; for colorectal cx	FDA approved
NTRK2	221796_at	Cabozantinib	http://www.cancer.gov/cancertopics/factsheet/Therapy/targeted	broad RTK inhibitor which suppresses metastasis, angiogenesis, and oncognesis; for medullary thyroid cx	FDA approved
PARP1	208644_at	Olaparib	https://www.centerwatch.com/drug-information/fda-approved-drugs/therapeutic-area/12/oncology	BRCAmut breast cancer	FDA approved
PARP1	208644_at	rucaparib	https://www.fda.gov/Drugs/InformationOnDrugs/ApprovedDrugs/ucm279174.htm	BRCA neg	FDA approved
PARP10	229350_x_at	Olaparib	https://www.centerwatch.com/drug-information/fda-approved-drugs/therapeutic-area/12/oncology	BRCAmut breast cancer	FDA approved
PARP10	229350_x_at	rucaparib	https://www.fda.gov/Drugs/InformationOnDrugs/ApprovedDrugs/ucm279174.htm	BRCA neg	FDA approved
PARP11	229138_at	Olaparib	https://www.centerwatch.com/drug-information/fda-approved-drugs/therapeutic-area/12/oncology	BRCAmut breast cancer	FDA approved
PARP12	218543_s_at	Olaparib	https://www.centerwatch.com/drug-information/fda-approved-drugs/therapeutic-area/12/oncology	BRCAmut breast cancer	FDA approved
PARP14	224701_at	Olaparib	https://www.centerwatch.com/drug-information/fda-approved-drugs/therapeutic-area/12/oncology	BRCAmut breast cancer	FDA approved
PARP15	1553380_at	Olaparib	https://www.centerwatch.com/drug-information/fda-approved-drugs/therapeutic-area/12/oncology	BRCAmut breast cancer	FDA approved
PARP15	1553380_at	rucaparib	https://www.fda.gov/Drugs/InformationOnDrugs/ApprovedDrugs/ucm279174.htm	BRCA neg	FDA approved
PARP16	219034_at	Olaparib	https://www.centerwatch.com/drug-information/fda-approved-drugs/therapeutic-area/12/oncology	BRCAmut breast cancer	FDA approved
PARP16	219034_at	rucaparib	https://www.fda.gov/Drugs/InformationOnDrugs/ApprovedDrugs/ucm279174.htm	BRCA neg	FDA approved
PARP2	214086_s_at	Olaparib	https://www.centerwatch.com/drug-information/fda-approved-drugs/therapeutic-area/12/oncology	BRCAmut breast cancer	FDA approved
PARP2	214086_s_at	rucaparib	https://www.fda.gov/Drugs/InformationOnDrugs/ApprovedDrugs/ucm279174.htm	BRCA neg	FDA approved
PARP3	209940_at	Olaparib	https://www.centerwatch.com/drug-information/fda-approved-drugs/therapeutic-area/12/oncology	BRCAmut breast cancer	FDA approved
PARP3	209940_at	rucaparib	https://www.fda.gov/Drugs/InformationOnDrugs/ApprovedDrugs/ucm279174.htm	BRCA neg	FDA approved
PARP3	209940_at	rucaparib	https://www.fda.gov/Drugs/InformationOnDrugs/ApprovedDrugs/ucm279174.htm	BRCA neg	FDA approved
PARP4	202239_at	Olaparib	https://www.centerwatch.com/drug-information/fda-approved-drugs/therapeutic-area/12/oncology	BRCAmut breast cancer	FDA approved
PARP4	202239_at	rucaparib	https://www.fda.gov/Drugs/InformationOnDrugs/ApprovedDrugs/ucm279174.htm	BRCA neg	FDA approved
PARP6	232683_s_at	Olaparib	https://www.centerwatch.com/drug-information/fda-approved-drugs/therapeutic-area/12/oncology	BRCAmut breast cancer	FDA approved
PARP8	244008_at	Olaparib	https://www.centerwatch.com/drug-information/fda-approved-drugs/therapeutic-area/12/oncology	BRCAmut breast cancer	FDA approved
PARP9	223220_s_at	Olaparib	https://www.centerwatch.com/drug-information/fda-approved-drugs/therapeutic-area/12/oncology	BRCAmut breast cancer	FDA approved
PDCD1	207634_at	Nivolumab	http://www.cancer.gov/cancertopics/factsheet/Therapy/targeted	for melanoma	FDA approved
PDCD1	207634_at	Pembrolizumab	http://www.cancer.gov/cancertopics/factsheet/Therapy/targeted	for melanoma	FDA approved
PDCD1	207634_at	atezolizumab	https://www.fda.gov/Drugs/InformationOnDrugs/ApprovedDrugs/ucm279174.htm	NSCLC	FDA approved
PDCD1LG2	220049_s_at	Nivolumab	http://www.cancer.gov/cancertopics/factsheet/Therapy/targeted	for melanoma	FDA approved
PDCD1LG2	220049_s_at	Pembrolizumab	http://www.cancer.gov/cancertopics/factsheet/Therapy/targeted	for melanoma	FDA approved
PDGFRA	203131_at	Axitinib	IPA	for renal cell carcinoma	FDA approved
PDGFRA	203131_at	Cabozantinib	http://www.cancer.gov/cancertopics/factsheet/Therapy/targeted	broad RTK inhibitor which suppresses metastasis, angiogenesis, and oncognesis; for medullary thyroid cx	FDA approved
PDGFRA	203131_at	Imatinib mesylate	http://www.glivec.com/about-glivec/molecular-targets.jsp	for CML, ALL, GIST	FDA approved
PDGFRA	203131_at	Lenvatinib	https://www.centerwatch.com/drug-information/fda-approved-drugs/therapeutic-area/12/oncology	thyroid cancer	FDA approved
PDGFRA	203131_at	Pazopanib	http://www.cancer.gov/cancertopics/factsheet/Therapy/targeted	for renal cell cx and sarcoma	FDA approved
PDGFRA	203131_at	Ponatinib	http://www.cancer.gov/drugdictionary?CdrID=595060	for BCR-ABL ALL and CML	FDA approved
PDGFRA	203131_at	Regorafenib	http://www.cancer.gov/cancertopics/factsheet/Therapy/targeted	broad RTK inhibitor which suppresses metastasis, angiogenesis, and oncognesis; for colorectal cx	FDA approved
PDGFRA	203131_at	Sunitinib	Shukla,S et al. Sunitinib (Sutent, SU11248), a Small-Molecule Receptor Tyrosine Kinase Inhibitor, Blocks Function of the ATP-Binding Cassette (ABC) Transporters P-Glycoprotein (ABCB1) and ABCG2. Drug Metab Dispos. 2009 February; 37(2): 359–365	for renal cell carcinoma, GIST	FDA approved
PDGFRA	203131_at	olaratumab	https://www.fda.gov/Drugs/InformationOnDrugs/ApprovedDrugs/ucm279174.htm	soft tissue sarcoma	FDA approved
PDGFRB	202273_at	Axitinib	IPA	for renal cell carcinoma	FDA approved
PDGFRB	202273_at	Cabozantinib	http://www.cancer.gov/cancertopics/factsheet/Therapy/targeted	broad RTK inhibitor which suppresses metastasis, angiogenesis, and oncognesis; for medullary thyroid cx	FDA approved
PDGFRB	202273_at	Dasatinib	http://www.flexyx.com/S/Sprycel.html	for CML, ALL, others	FDA approved
PDGFRB	202273_at	Imatinib mesylate	http://www.glivec.com/about-glivec/molecular-targets.jsp	for CML, ALL, GIST	FDA approved
PDGFRB	202273_at	Pazopanib	http://www.cancer.gov/cancertopics/factsheet/Therapy/targeted	for renal cell cx and sarcoma	FDA approved
PDGFRB	202273_at	Regorafenib	http://www.cancer.gov/cancertopics/factsheet/Therapy/targeted	broad RTK inhibitor which suppresses metastasis, angiogenesis, and oncognesis; for colorectal cx	FDA approved
PDGFRB	202273_at	Sorafenib	Wilhelm SM et al. Preclinical overview of sorafenib, a multikinase inhibitor that targets both Raf and VEGF and PDGF receptor tyrosine kinase signaling. Mol Cancer Ther October 2008 7; 3129	for renal cell carcinoma	FDA approved
PDGFRB	202273_at	Sunitinib	Shukla,S et al. Sunitinib (Sutent, SU11248), a Small-Molecule Receptor Tyrosine Kinase Inhibitor, Blocks Function of the ATP-Binding Cassette (ABC) Transporters P-Glycoprotein (ABCB1) and ABCG2. Drug Metab Dispos. 2009 February; 37(2): 359–365	for renal cell carcinoma, GIST	FDA approved
PIGF	205077_s_at	Ziv-aflibercept	http://www.cancer.gov/cancertopics/factsheet/Therapy/targeted	for colorectal cx	FDA approved
PIK3CD	203879_at	Idelalisib	http://www.cancer.gov/cancertopics/factsheet/Therapy/targeted	for B-cell cxs	FDA approved
POLA1	204835_at	Clofarabine	IPA	for ALL cx	FDA approved
POLA1	204835_at	Cytarabine	IPA	used mainly in the treatment of cancers of white blood cells such as acute myeloid leukemia	FDA approved
POLA1	204835_at	Fludarabine phosphate	IPA		FDA approved
POLA1	204835_at	Nelarabine	IPA	for ALL cx	FDA approved
POLD1	203422_at	Clofarabine	IPA	for ALL cx	FDA approved
POLD1	203422_at	Cytarabine	IPA	used mainly in the treatment of cancers of white blood cells such as acute myeloid leukemia	FDA approved
POLD1	203422_at	Nelarabine	IPA	for ALL cx	FDA approved
POLE	216026_s_at	Clofarabine	IPA	for ALL cx	FDA approved
POLE	216026_s_at	Gemcitabine	IPA	for various solid cancers	FDA approved
POLE	216026_s_at	Nelarabine	IPA	for ALL cx	FDA approved
POLE2	205909_at	Gemcitabine	IPA	for various solid cancers	FDA approved
POR	208928_at	Daunorubicin	IPA	for AML, ALL	FDA approved
POR	208928_at	Doxorubicin	IPA	for multiple cancers	FDA approved
PPAT	209433_s_at	Mercaptopurine	IPA		FDA approved
PPAT	209433_s_at	Thioguanine	IPA	for leukemia	FDA approved
PRIM1	205053_at	Fludarabine phosphate	IPA		FDA approved
PRIM2	205628_at	Fludarabine phosphate	IPA		FDA approved
PSMB1	200876_s_at	Carfilzomib	http://www.cancer.gov/cancertopics/factsheet/Therapy/targeted	inhibits the 20S proteosome catalytic core, approved for multiple myeloma	FDA approved
PSMB2	200039_s_at	Carfilzomib	http://www.cancer.gov/cancertopics/factsheet/Therapy/targeted	inhibits the 20S proteosome catalytic core, approved for multiple myeloma	FDA approved
PSMB5	208799_at	Bortezomib	http://bloodjournal.hematologylibrary.org/cgi/reprint/blood-2007-08-104950v1.pdf	targets the 26S proteosome to prevent degr of tumor suppressors	FDA approved
PSMB5	208799_at	Carfilzomib	http://www.cancer.gov/cancertopics/factsheet/Therapy/targeted	inhibits the 20S proteosome catalytic core, approved for multiple myeloma	FDA approved
PTGS2	204748_at	Lenalidomide	http://www.cancer.gov/cancertopics/factsheet/Therapy/targeted	also other mechanisms of action that haven't been clarified yet	FDA approved
PTGS2	204748_at	Pomalidomide	http://www.cancer.gov/cancertopics/factsheet/Therapy/targeted	for multiple myeloma	FDA approved
RAF1	201244_s_at	Dabrafenib	http://www.cancer.gov/cancertopics/factsheet/Therapy/targeted	for melanoma with BRAF V600E mut	FDA approved
RAF1	201244_s_at	Regorafenib	http://www.cancer.gov/cancertopics/factsheet/Therapy/targeted	broad RTK inhibitor which suppresses metastasis, angiogenesis, and oncognesis; for colorectal cx	FDA approved
RAF1	201244_s_at	Sorafenib	Wilhelm SM et al. Preclinical overview of sorafenib, a multikinase inhibitor that targets both Raf and VEGF and PDGF receptor tyrosine kinase signaling. Mol Cancer Ther October 2008 7; 3129	for renal cell carcinoma	FDA approved
RARA	203749_s_at	bexarotene	Boylan JF1, Lufkin T, Achkar CC, Taneja R, Chambon P, Gudas LJ. Targeted disruption of retinoic acid receptor alpha (RAR alpha) and RAR gamma results in receptor-specific alterations in retinoic acid-mediated differentiation and retinoic acid metabolism. Mol Cell Biol. 1995 Feb;15(2):843-51.	approved for certain lymphomas	FDA approved
RARA	203749_s_at	tretinoin	Boylan JF1, Lufkin T, Achkar CC, Taneja R, Chambon P, Gudas LJ. Targeted disruption of retinoic acid receptor alpha (RAR alpha) and RAR gamma results in receptor-specific alterations in retinoic acid-mediated differentiation and retinoic acid metabolism. Mol Cell Biol. 1995 Feb;15(2):843-51.	approved for certain leukemias	FDA approved
RARA	203749_s_at	isotretinoin	Boylan JF1, Lufkin T, Achkar CC, Taneja R, Chambon P, Gudas LJ. Targeted disruption of retinoic acid receptor alpha (RAR alpha) and RAR gamma results in receptor-specific alterations in retinoic acid-mediated differentiation and retinoic acid metabolism. Mol Cell Biol. 1995 Feb;15(2):843-51.	approved for neuroblastoma	FDA approved
RARB	205080_at	bexarotene	Boylan JF1, Lufkin T, Achkar CC, Taneja R, Chambon P, Gudas LJ. Targeted disruption of retinoic acid receptor alpha (RAR alpha) and RAR gamma results in receptor-specific alterations in retinoic acid-mediated differentiation and retinoic acid metabolism. Mol Cell Biol. 1995 Feb;15(2):843-51.	approved for certain lymphomas	FDA approved
RARB	205080_at	tretinoin	Boylan JF1, Lufkin T, Achkar CC, Taneja R, Chambon P, Gudas LJ. Targeted disruption of retinoic acid receptor alpha (RAR alpha) and RAR gamma results in receptor-specific alterations in retinoic acid-mediated differentiation and retinoic acid metabolism. Mol Cell Biol. 1995 Feb;15(2):843-51.	approved for certain leukemias	FDA approved
RARB	205080_at	isotretinoin	Boylan JF1, Lufkin T, Achkar CC, Taneja R, Chambon P, Gudas LJ. Targeted disruption of retinoic acid receptor alpha (RAR alpha) and RAR gamma results in receptor-specific alterations in retinoic acid-mediated differentiation and retinoic acid metabolism. Mol Cell Biol. 1995 Feb;15(2):843-51.	approved for neuroblastoma	FDA approved
RARG	204189_at	bexarotene	Boylan JF1, Lufkin T, Achkar CC, Taneja R, Chambon P, Gudas LJ. Targeted disruption of retinoic acid receptor alpha (RAR alpha) and RAR gamma results in receptor-specific alterations in retinoic acid-mediated differentiation and retinoic acid metabolism. Mol Cell Biol. 1995 Feb;15(2):843-51.	approved for certain lymphomas	FDA approved
RARG	204189_at	tretinoin	Boylan JF1, Lufkin T, Achkar CC, Taneja R, Chambon P, Gudas LJ. Targeted disruption of retinoic acid receptor alpha (RAR alpha) and RAR gamma results in receptor-specific alterations in retinoic acid-mediated differentiation and retinoic acid metabolism. Mol Cell Biol. 1995 Feb;15(2):843-51.	approved for certain leukemias	FDA approved
RARG	204189_at	isotretinoin	Boylan JF1, Lufkin T, Achkar CC, Taneja R, Chambon P, Gudas LJ. Targeted disruption of retinoic acid receptor alpha (RAR alpha) and RAR gamma results in receptor-specific alterations in retinoic acid-mediated differentiation and retinoic acid metabolism. Mol Cell Biol. 1995 Feb;15(2):843-51.	approved for neuroblastoma	FDA approved
RET	211421_s_at	Cabozantinib	http://www.cancer.gov/cancertopics/factsheet/Therapy/targeted	broad RTK inhibitor which suppresses metastasis, angiogenesis, and oncognesis; for medullary thyroid cx	FDA approved
RET	211421_s_at	Lenvatinib	https://www.centerwatch.com/drug-information/fda-approved-drugs/therapeutic-area/12/oncology	thyroid cancer	FDA approved
RET	211421_s_at	Regorafenib	http://www.cancer.gov/cancertopics/factsheet/Therapy/targeted	broad RTK inhibitor which suppresses metastasis, angiogenesis, and oncognesis; for colorectal cx	FDA approved
RET	211421_s_at	Sorafenib	Wilhelm SM et al. Preclinical overview of sorafenib, a multikinase inhibitor that targets both Raf and VEGF and PDGF receptor tyrosine kinase signaling. Mol Cancer Ther October 2008 7; 3129	for renal cell carcinoma	FDA approved
RET	211421_s_at	Sunitinib	Shukla,S et al. Sunitinib (Sutent, SU11248), a Small-Molecule Receptor Tyrosine Kinase Inhibitor, Blocks Function of the ATP-Binding Cassette (ABC) Transporters P-Glycoprotein (ABCB1) and ABCG2. Drug Metab Dispos. 2009 February; 37(2): 359–365	for renal cell carcinoma, GIST	FDA approved
RFC1	209085_x_at	Pralatrexate	http://www.cancer.gov/cancertopics/factsheet/Therapy/targeted	for peripheral T-cell lymphoma	FDA approved
ROS1	207569_at	Crizotinib	http://www.cancer.gov/cancertopics/factsheet/Therapy/targeted	for NSCLC	FDA approved
RRAS	212647_at	Sorafenib	Wilhelm SM et al. Preclinical overview of sorafenib, a multikinase inhibitor that targets both Raf and VEGF and PDGF receptor tyrosine kinase signaling. Mol Cancer Ther October 2008 7; 3129	for renal cell carcinoma	FDA approved
RRM1	201477_s_at	Clofarabine	IPA	for ALL cx	FDA approved
RRM1	201477_s_at	Fludarabine phosphate	IPA		FDA approved
RRM1	201477_s_at	Gemcitabine	IPA	for various solid cancers	FDA approved
RRM2	201890_at	Fludarabine phosphate	IPA		FDA approved
RRM2	201890_at	Gemcitabine	IPA	for various solid cancers	FDA approved
RRM2	201890_at	Hydroxyurea	IPA	CML (tho largely replaced by imatinib)	FDA approved
SIK1	208078_s_at	Dabrafenib	http://www.cancer.gov/cancertopics/factsheet/Therapy/targeted	for melanoma with BRAF V600E mut	FDA approved
SLAMF7	219159_s_at	elotuzumab	https://www.fda.gov/Drugs/InformationOnDrugs/ApprovedDrugs/ucm279174.htm	multiple myeloma	FDA approved
SMO	218629_at	Vismodegib	http://www.cancer.gov/cancertopics/factsheet/Therapy/targeted	for basal cell carcinoma; inhibits SHH pathway	FDA approved
SMO	218629_at	Sonidegib	https://www.fda.gov/Drugs/InformationOnDrugs/ApprovedDrugs/ucm279174.htm	Basal cell carcinoma	FDA approved
SRC	213324_at	Bosutinib	http://www.cancer.gov/cancertopics/factsheet/Therapy/targeted	for same cx as gleevec	FDA approved
SRC	213324_at	Dasatinib	http://www.flexyx.com/S/Sprycel.html	for CML, ALL, others	FDA approved
TEK	206702_at	Cabozantinib	http://www.cancer.gov/cancertopics/factsheet/Therapy/targeted	broad RTK inhibitor which suppresses metastasis, angiogenesis, and oncognesis; for medullary thyroid cx	FDA approved
TEK	206702_at	Regorafenib	http://www.cancer.gov/cancertopics/factsheet/Therapy/targeted	broad RTK inhibitor which suppresses metastasis, angiogenesis, and oncognesis; for colorectal cx	FDA approved
TGFB2	228121_at	AP-12009	IPA	for glioma, TGF-b2 specific antisense oligodeoxynucleotide	FDA approved
TNFSF11	210643_at	Denosumab	http://www.cancer.gov/cancertopics/factsheet/Therapy/targeted	for the prevention of skeletal-related events in patients with bone metastases from solid tumors, also multiple myeloma, and giant cell tumor of bone	FDA approved
TOP1	208901_s_at	Irinotecan	http://www.cancer.gov/drugdictionary?CdrID=41714	for colon cancer	FDA approved
TOP1	208901_s_at	Topotecan	http://www.cancer.gov/drugdictionary?CdrID=41185	various solid tumors	FDA approved
TOP2A	201292_at	Daunorubicin	IPA	for AML, ALL	FDA approved
TOP2A	201292_at	Doxorubicin	IPA	for multiple cancers	FDA approved
TOP2A	201292_at	Epirubicin	IPA	for breast cancer	FDA approved
TOP2A	201292_at	Etoposide	IPA		FDA approved
TOP2A	201292_at	Idarubicin	http://www.cancer.gov/drugdictionary?CdrID=39753	for AML	FDA approved
TOP2A	201292_at	Mitoxantrone	IPA	for AML, ALL, breast	FDA approved
TOP2A	201292_at	Teniposide	http://www.cancer.gov/drugdictionary?CdrID=43671	for ALL cx	FDA approved
TOP2A	201292_at	Valrubicin	IPA	bladder cancer	FDA approved
TUBB	211714_x_at	Brentuximab vedotin	IPA	for Hodgkin's lymphoma and anaplastic large cell lymphoma	FDA approved
TUBB	211714_x_at	Cabazitaxel	IPA	for metastatic hormone refractory prostate cancer	FDA approved
TUBB6	209191_at	Brentuximab vedotin	IPA	for Hodgkin's lymphoma and anaplastic large cell lymphoma	FDA approved
TUBB6	209191_at	Cabazitaxel	IPA	for metastatic hormone refractory prostate cancer	FDA approved
TUBD1	210389_x_at	Docetaxel	IPA	for multiple cancers	FDA approved
TUBD1	210389_x_at	Eribulin	IPA	inhibits microtubules, for breast cancer	FDA approved
TUBD1	210389_x_at	Ixabepilone	IPA	inhibits microtubules, for breast cancer	FDA approved
TUBD1	210389_x_at	Paclitaxel	IPA	for various solid cancers	FDA approved
TUBD1	210389_x_at	Vinblastine	IPA	various solid tumors	FDA approved
TUBD1	210389_x_at	Vincristine	IPA	various solid tumors	FDA approved
TUBD1	210389_x_at	Vinorelbine	IPA	various solid tumors	FDA approved
TYMS	202589_at	5-fluorouracil	IPA		FDA approved
TYMS	202589_at	Capecitabine	IPA	numerous cxs, becomes 5-FU in body	FDA approved
TYMS	202589_at	Floxuridine	IPA		FDA approved
TYMS	202589_at	Pemetrexed	IPA	aka LY231514, for mesothelioma and NSCLC	FDA approved
VEGFA	210512_s_at	Axitinib	IPA	for renal cell carcinoma	FDA approved
VEGFA	210512_s_at	Bevacizumab	http://www.cancer.gov/cancertopics/factsheet/Therapy/targeted	anti-angiogenesis; targets VEGF, so good if VEGF receptors (FLT*) are up	FDA approved
VEGFA	210512_s_at	Ramucirumab	http://www.cancer.gov/cancertopics/factsheet/Therapy/targeted	selective for KDR (aka VEGFR2); anti-angiogenic; for NSCLC and gastric cancer	FDA approved
VEGFA	210512_s_at	Sorafenib	Wilhelm SM et al. Preclinical overview of sorafenib, a multikinase inhibitor that targets both Raf and VEGF and PDGF receptor tyrosine kinase signaling. Mol Cancer Ther October 2008 7; 3129	for renal cell carcinoma	FDA approved
VEGFA	210512_s_at	Sunitinib	Shukla,S et al. Sunitinib (Sutent, SU11248), a Small-Molecule Receptor Tyrosine Kinase Inhibitor, Blocks Function of the ATP-Binding Cassette (ABC) Transporters P-Glycoprotein (ABCB1) and ABCG2. Drug Metab Dispos. 2009 February; 37(2): 359–365	for renal cell carcinoma, GIST	FDA approved
VEGFA	210512_s_at	Ziv-aflibercept	http://www.cancer.gov/cancertopics/factsheet/Therapy/targeted	for colorectal cx	FDA approved
VEGFB	203683_s_at	Axitinib	IPA	for renal cell carcinoma	FDA approved
VEGFB	203683_s_at	Bevacizumab	http://www.cancer.gov/cancertopics/factsheet/Therapy/targeted	anti-angiogenesis; targets VEGF, so good if VEGF receptors (FLT*) are up	FDA approved
VEGFB	203683_s_at	Sorafenib	Wilhelm SM et al. Preclinical overview of sorafenib, a multikinase inhibitor that targets both Raf and VEGF and PDGF receptor tyrosine kinase signaling. Mol Cancer Ther October 2008 7; 3129	for renal cell carcinoma	FDA approved
VEGFB	203683_s_at	Sunitinib	Shukla,S et al. Sunitinib (Sutent, SU11248), a Small-Molecule Receptor Tyrosine Kinase Inhibitor, Blocks Function of the ATP-Binding Cassette (ABC) Transporters P-Glycoprotein (ABCB1) and ABCG2. Drug Metab Dispos. 2009 February; 37(2): 359–365	for renal cell carcinoma, GIST	FDA approved
VEGFC	209946_at	Axitinib	IPA	for renal cell carcinoma	FDA approved
VEGFC	209946_at	Bevacizumab	http://www.cancer.gov/cancertopics/factsheet/Therapy/targeted	anti-angiogenesis; targets VEGF, so good if VEGF receptors (FLT*) are up	FDA approved
VEGFC	209946_at	Ramucirumab	http://www.cancer.gov/cancertopics/factsheet/Therapy/targeted	selective for KDR (aka VEGFR2); anti-angiogenic; for NSCLC and gastric cancer	FDA approved
VEGFC	209946_at	Sorafenib	Wilhelm SM et al. Preclinical overview of sorafenib, a multikinase inhibitor that targets both Raf and VEGF and PDGF receptor tyrosine kinase signaling. Mol Cancer Ther October 2008 7; 3129	for renal cell carcinoma	FDA approved
VEGFC	209946_at	Sunitinib	Shukla,S et al. Sunitinib (Sutent, SU11248), a Small-Molecule Receptor Tyrosine Kinase Inhibitor, Blocks Function of the ATP-Binding Cassette (ABC) Transporters P-Glycoprotein (ABCB1) and ABCG2. Drug Metab Dispos. 2009 February; 37(2): 359–365	for renal cell carcinoma, GIST	FDA approved
YES1	202933_s_at	Dasatinib	http://www.flexyx.com/S/Sprycel.html	for CML, ALL, others	FDA approved

## Sheet: GSEA of axitinib Tx
MsigDB HALLMARK geneset			811				928
Depleted in both EPN cell lines in response to IC-50 axitinib
	ave NES		NES	NOM p-val	FDR q-val		NES	NOM p-val	FDR q-val
HALLMARK_E2F_TARGETS	-2.58329		-2.51025	0	0		-2.65633	0	0
HALLMARK_G2M_CHECKPOINT	-2.47685		-2.48811	0	0		-2.46559	0	0
HALLMARK_MYC_TARGETS_V1	-1.96861		-1.96962	0	0		-1.9676	0	0
HALLMARK_MITOTIC_SPINDLE	-1.77648		-2.08786	0	0		-1.4651	0	0.0539126
HALLMARK_MYC_TARGETS_V2	-1.60392		-1.84454	0	0.000304762		-1.36329	0.0565371	0.0823838
HALLMARK_INFLAMMATORY_RESPONSE	-1.34467		-1.06208	0.302	0.516548		-1.62727	0	0.0165776
HALLMARK_KRAS_SIGNALING_UP	-1.30356		-1.21947	0.0498084	0.238464		-1.38765	0	0.0799283
HALLMARK_MTORC1_SIGNALING	-1.29545		-1.40426	0	0.0727144		-1.18664	0.0466667	0.26873
HALLMARK_COMPLEMENT	-1.18261		-1.19878	0.0883534	0.227675		-1.16644	0.0948905	0.282406
HALLMARK_TNFA_SIGNALING_VIA_NFKB	-1.18129		-1.22093	0.0547667	0.255556		-1.14165	0.103448	0.297444
HALLMARK_UNFOLDED_PROTEIN_RESPONSE	-1.14884		-1.21765	0.114963	0.224514		-1.08004	0.266968	0.354163
HALLMARK_ALLOGRAFT_REJECTION	-1.0728		-1.05074	0.349076	0.499173		-1.09485	0.18	0.343901
HALLMARK_COAGULATION	-1.06157		-0.99698	0.451923	0.570454		-1.12617	0.172249	0.30038
Enriched in both EPN cell lines in response to IC-50 axitinib
	ave NES		NES	NOM p-val	FDR q-val		NES	NOM p-val	FDR q-val
HALLMARK_INTERFERON_ALPHA_RESPONSE	1.92916		1.88628	0	0		1.97205	0	0
HALLMARK_INTERFERON_GAMMA_RESPONSE	1.58699		1.50109	0.0019685	0.0500808		1.6729	0	0.0070503
HALLMARK_MYOGENESIS	1.51431		1.3666	0.00785855	0.108372		1.66202	0	0.00652086
HALLMARK_P53_PATHWAY	1.34867		1.14271	0.143678	0.349686		1.55463	0.00114679	0.0208571
HALLMARK_XENOBIOTIC_METABOLISM	1.27371		1.20138	0.0914894	0.338522		1.34605	0.0238095	0.159698
HALLMARK_WNT_BETA_CATENIN_SIGNALING	1.2384		1.09762	0.312734	0.435858		1.37917	0.0560224	0.152817
HALLMARK_HEDGEHOG_SIGNALING	1.21488		1.15628	0.228346	0.355107		1.27347	0.132047	0.155915
